# Supplementary material for: The Physical Adsorption of Gelatinized Starch with Tannic Acid Decreases the Inhibitory Activity of the Polyphenol against α-Amylase
Source: MDPI journal article supplement (doi:10.3390/foods10061233), 2021-05-28
Supplement: s1 [file s1]

**Order 1** TA + α-Amylase  $\xrightarrow[\text{for 15 min}]{\text{Incubation at 4}^\circ\text{C}}$  Mixture of TA and α-amylase + Gelatinized starch  $\longrightarrow$  Start reaction at 37°C

**Order 2** TA + Pre-gelatinized starch  $\xrightarrow[\text{for 15 min}]{\text{Incubation at 37}^\circ\text{C}}$  Mixture of TA and gelatinized starch + α-Amylase  $\longrightarrow$  Start reaction at 37°C

**Order 3** TA + Raw starch  $\xrightarrow[\text{for 20 min}]{\text{co-gelatinization at 90}^\circ\text{C}}$  Co-gelatinized TA-starch + α-Amylase  $\longrightarrow$  Start reaction at 37°C
